# Supplementary material for: Linked nosocomial COVID-19 outbreak in three facilities for people with intellectual and developmental disabilities due to SARS-CoV-2 variant B.1.1.519 with spike mutation T478K in the Netherlands
Source: Springer Nature journal article supplement (doi:10.1186/s12879-022-07121-y), 2022-02-09
Supplement: MOESM1 [file 20122180]

**Additional file 1**

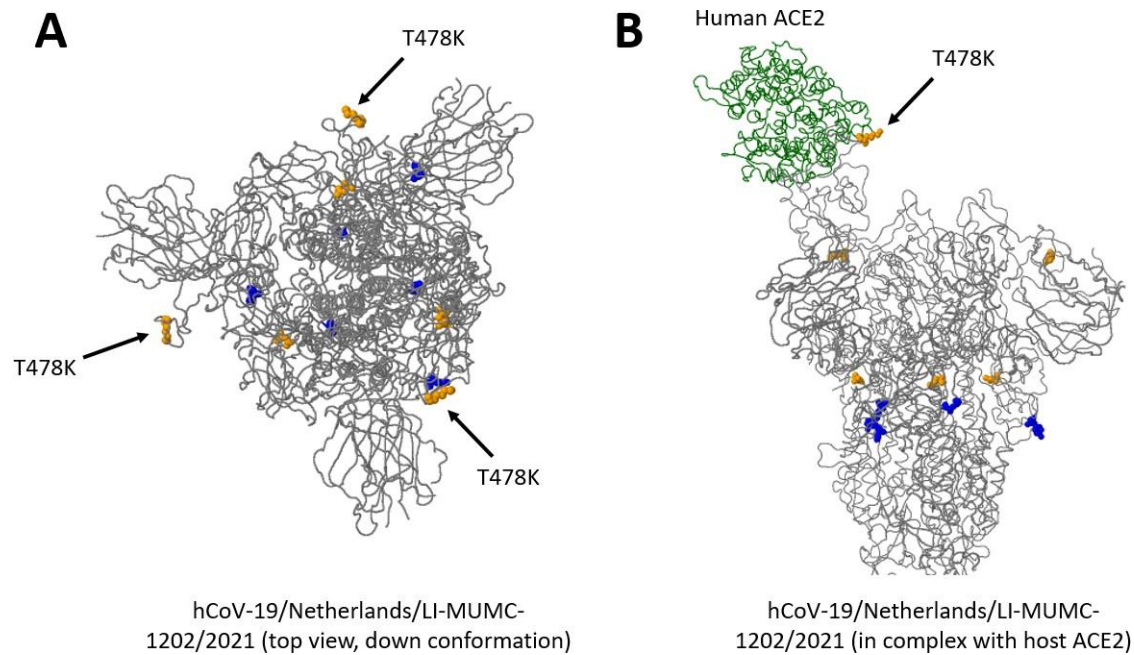

**Figure S1.** Position of the T478K amino acid substitution in the 3D-model of the SARS-CoV-2 Spike protein of the B.1.1.519 variant in down conformation (**A**), or bound to the human Ace2 receptor (**B**)

**Table S1.** Oligonucleotides used in this study.

| Target             | Primer/Probe    | 5' mod | Seq 5' – 3'                | 3' mod | Tm (°C) | Notes                              |
|--------------------|-----------------|--------|----------------------------|--------|---------|------------------------------------|
| SARS-CoV-2 E gene  | SARS-CoV-2-E_F  | FAM    | ACAGGTACGTTAATAGTTAATAGCGT | BHQ1   | 62.6    | Sarbecovirus/<br>SARS-CoV<br>broad |
|                    | SARS-CoV-2-E_R  |        | ATATTGCAGCAGTACGCACACA     |        | 64.8    |                                    |
|                    | SARS-CoV-2-E_P  |        | ACACTAGCCATCCTTACTGCGCTTCG |        | 69.3    |                                    |
| SARS-CoV-2 N1 gene | SARS-CoV-2-N1_F | ABY*   | GACCCCAAATCAGCGAAAT        | QSY    | 61.1    | SARS-CoV-2<br>specific             |
|                    | SARS-CoV-2-N1_R |        | TCTGGTTACTGCCAGTTGAATCTG   |        | 64.5    |                                    |
|                    | SARS-CoV-2-N1_P |        | ACCCCGCATTACGTTTGGTGGACC   |        | 70.3    |                                    |
| mCMV-ie            | mCMV-ie_F       | Cy5    | CAACATTGACCACGCACTAGATG    | BHQ3   | 63.6    | MUMC RNA<br>internal control       |
|                    | mCMV-ie_R       |        | TTAAACTCCCCAGGCAATGAA      |        | 62.2    |                                    |
|                    | mCMV-ie_P       |        | TCTTGGCCCATGCGGCACG        |        | 69.7    |                                    |
